# Supplementary material for: Unveiling the atomic defects and electronic structure of Cu2.2Zn0.8SnSe4−xTex (x = 0 to 0.04) by X-ray absorption fine structure spectroscopy
Source: Royal Society of Chemistry journal article supplement (doi:10.1039/d0cp01153c), 2020-01-01
Supplement: d0cp01153c1.pdf [file d0cp01153c1.pdf]

# Supporting materials for

Unveiling the atomic defects and electronic structure in  $\text{Cu}_{2.2}\text{Zn}_{0.8}\text{SnSe}_{4-x}\text{Te}_x$  ( $x=0$  to 0.04) by X-ray absorption Fine structure spectroscopy

1. EXAFS spectra and XANES spectra; Figure.S1-S6
2. EXAFS fitting results: Table.S1-S6
3. XANES calculation generated electronic occupation: Table.S7-S11

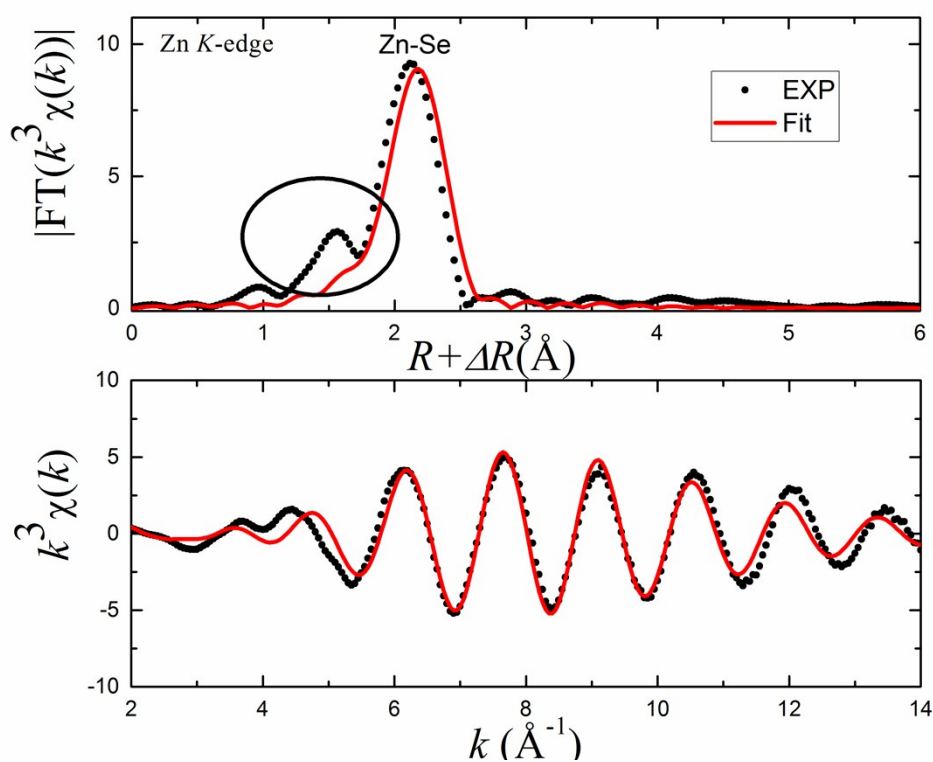

**Figure.S1.** The Zn K-edge EXAFS spectrum cannot be fitted well with CZTSe model; the black ellipse highlights the unidentified peak

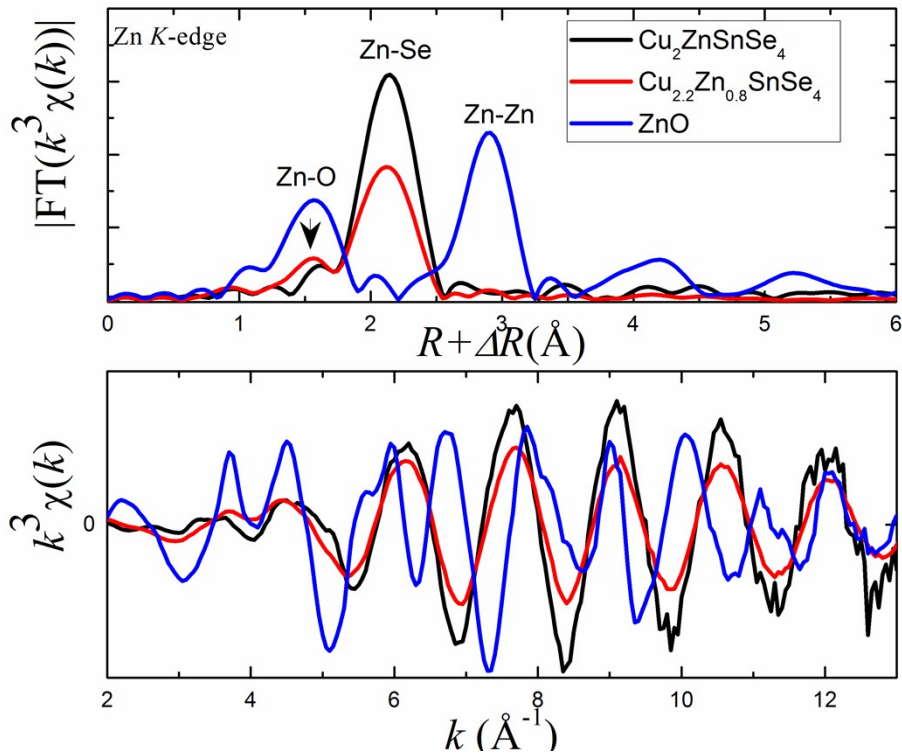

**Figure.S2** Comparison of Zn K-edge EXAFS spectra for the oxygen-free  $\text{Cu}_2\text{ZnSnSe}_4$ ,  $\text{Cu}_{2.2}\text{Zn}_{0.8}\text{SnSe}_4$  in this work and reference ZnO; the pronounced peak was identified as Zn-O bond.

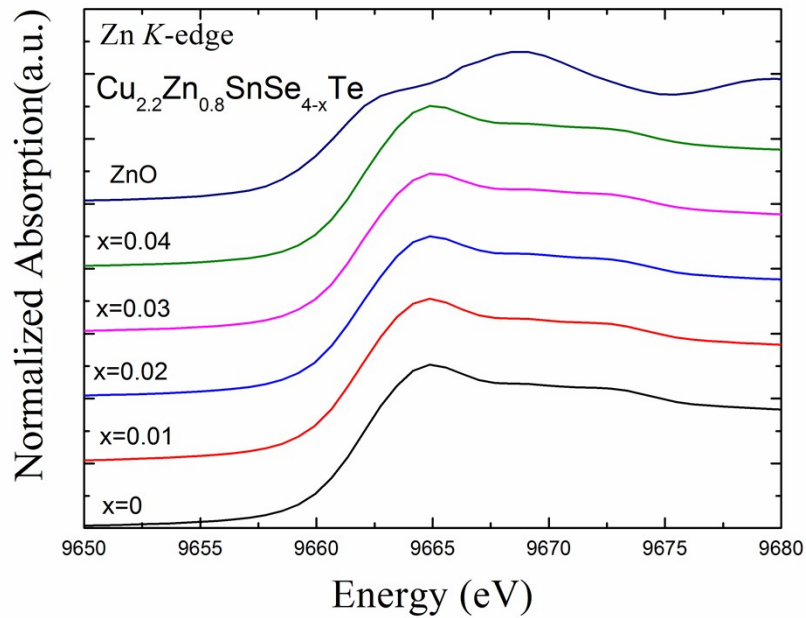

**Figure.S3** Comparison of XANES at Zn K-edge for  $\text{Cu}_{2.2}\text{Zn}_{0.8}\text{SnSe}_{4-x}\text{Te}_x$  ( $x=0-0.04$ ) and ZnO

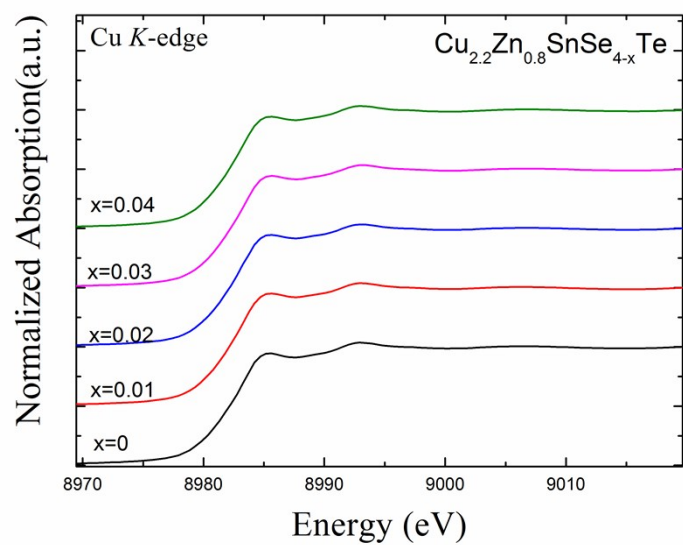

**Figure.S4** Comparison of XANES at Cu K-edge for  $\text{Cu}_{2.2}\text{Zn}_{0.8}\text{SnSe}_{4-x}\text{Te}_x$  ( $x=0-0.04$ )

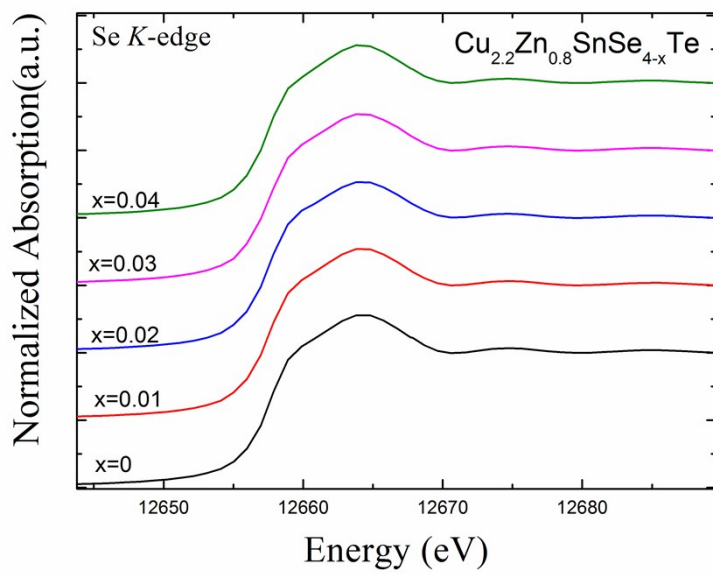

**Figure.S5** Comparison of XANES at Se K-edge for  $\text{Cu}_{2.2}\text{Zn}_{0.8}\text{SnSe}_{4-x}\text{Te}_x$  ( $x=0-0.04$ )

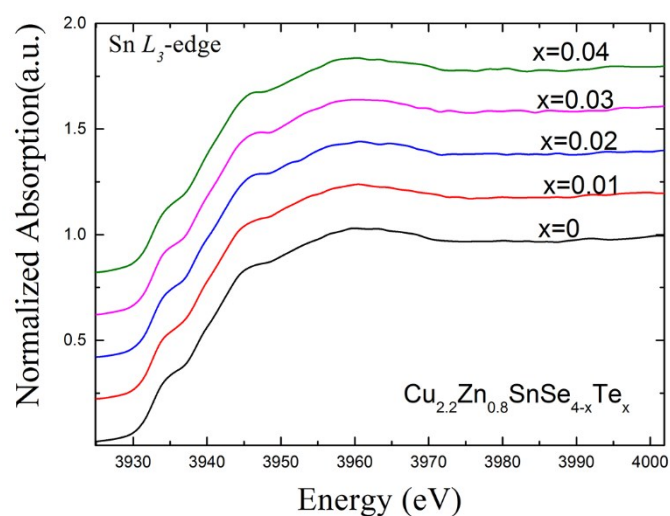

**Figure.S6** Comparison of XANES at Sn  $L_3$ -edge for  $\text{Cu}_{2.2}\text{Zn}_{0.8}\text{SnSe}_{4-x}\text{Te}_x$  ( $x=0-0.04$ )

**Table.S1** Local coordination environment for Keisterite and stannite phase  $\text{Cu}_2\text{ZnSnSe}_4$

| Phase | Keisterite   |                       | Stannite         |             |                  |
|-------|--------------|-----------------------|------------------|-------------|------------------|
|       | Central atom | First shell           | Bond-distance(Å) | First shell | Bond-distance(Å) |
| Zn    | Cu           | Zn-4Se                | 2.4873           | Zn-4Se      | 2.5050           |
|       |              | Cu <sub>2a</sub> -4Se | 2.4424           | Cu-4Se      | 2.4287           |
| Se    | Sn           | Cu <sub>2c</sub> -4Se | 2.4415           | Se-2Cu      | 2.4287           |
|       |              | Se-Cu <sub>2c</sub>   | 2.4415           |             |                  |
|       |              | Se-Cu <sub>2a</sub>   | 2.4423           |             |                  |
| Sn    | Se           | Se-1Zn                | 2.4873           | Se-1Zn      | 2.5050           |
|       |              | Se-1Sn                | 2.6152           | Se-1Sn      | 2.6222           |
|       |              | Sn-4Se                | 2.6152           | Sn-4Se      | 2.6222           |

**Table.S2.** EXAFS Fitting parameters at Zn, Cu and Se K-edge for  $\text{Cu}_{2.2}\text{Zn}_{0.8}\text{SnSe}_{4-x}\text{Te}_x$  ( $x=0-0.04$ )

|           | $k$ range[Å <sup>-1</sup> ] | $R$      | $S_0^2$ | $k$    | Independent point |
|-----------|-----------------------------|----------|---------|--------|-------------------|
|           | 1]                          | range[Å] |         | weight | $N_{\text{idp}}$  |
| Zn K-edge | 2-13                        | 1-3      | 0.97    | 3      | 11                |
| Cu K-edge | 2-13                        | 1-3      | 0.9     | 3      | 11                |
| Se K-edge | 2-13                        | 1-3      | 0.9     | 3      | 11                |

**Table.S3.** EXAFS Fitting results of pristine  $\text{Cu}_{2.2}\text{Zn}_{0.8}\text{SnSe}_4$  at Zn, Cu and Se *K*-edge using Keisterite (I-4, SG82) and Stannite phase (I-42m, SG121), respectively; CN: coordination number, R: bond distance,  $\sigma^2$ : means square relative displacement,  $\Delta E$ : energy shift; R-factor: fitting quality

| Zn <i>K</i> -edge, SG121                      | Path  | CN            | R( $\text{\AA}$ ) | $\sigma^2 (\times 10^{-3}) (\text{\AA}^2)$ | $\Delta E(\text{eV})$ | R-factor |
|-----------------------------------------------|-------|---------------|-------------------|--------------------------------------------|-----------------------|----------|
| $\text{Cu}_{2.2}\text{Zn}_{0.8}\text{SnSe}_4$ | Zn-Se | $2.7 \pm 0.6$ | $2.44 \pm 0.004$  | $7.3 \pm 0.5$                              | 0.882                 | 0.007    |
|                                               | Zn-O  | $0.9 \pm 0.1$ | $1.95 \pm 0.012$  |                                            |                       |          |
| <b>Zn <i>K</i>-edge, SG82</b>                 |       |               |                   |                                            |                       |          |
| $\text{Cu}_{2.2}\text{Zn}_{0.8}\text{SnSe}_4$ | Zn-Se | $2.7 \pm 0.2$ | $2.44 \pm 0.004$  | $7.3 \pm 0.6$                              | $0.871 \pm 0.06$      | 0.007    |
|                                               | Zn-O  | $0.9 \pm 0.1$ | $1.95 \pm 0.012$  |                                            | $0.871 \pm 0.06$      |          |
| <b>Cu <i>K</i>-edge, SG121</b>                |       |               |                   |                                            |                       |          |
| $\text{Cu}_{2.2}\text{Zn}_{0.8}\text{SnSe}_4$ | Cu-Se | $3.2 \pm 0.3$ | $2.40 \pm 0.004$  | $8.2 \pm 0.7$                              | $1 \pm 0.812$         | 0.006    |
| <b>Cu <i>K</i>-edge SG82</b>                  |       |               |                   |                                            |                       |          |
| $\text{Cu}_{2.2}\text{Zn}_{0.8}\text{SnSe}_4$ | Cu-Se | $3.2 \pm 0.2$ | $2.40 \pm 0.004$  | $8.2 \pm 0.6$                              | $0.992 \pm 0.812$     | 0.003    |
| <b>Se <i>K</i>-edge, SG121</b>                |       |               |                   |                                            |                       |          |
| $\text{Cu}_{2.2}\text{Zn}_{0.8}\text{SnSe}_4$ | Se-Cu | $1.7 \pm 0.3$ | $2.40 \pm 0.004$  | $4.49 \pm 1.4$                             | $1.37 \pm 1.24$       | 0.02     |
|                                               | Se-Zn | $0.1 \pm 0.1$ | $2.44 \pm 0.004$  |                                            |                       |          |
|                                               | Se-Sn | $1.0 \pm 0.2$ | $2.56 \pm 0.020$  |                                            |                       |          |
| <b>Se <i>K</i>-edge, SG82</b>                 |       |               |                   |                                            |                       |          |
| $\text{Cu}_{2.2}\text{Zn}_{0.8}\text{SnSe}_4$ | Se-Cu | $1.7 \pm 0.3$ | $2.40 \pm 0.004$  | $4.43 \pm 1.42$                            | $1.43 \pm 1.24$       | 0.02     |
|                                               | Se-Zn | $0.1 \pm 0.1$ | $2.44 \pm 0.004$  |                                            |                       |          |
|                                               | Se-Sn | $0.6 \pm 0.2$ | $2.56 \pm 0.020$  |                                            |                       |          |

**Table.S4** Zn *K*-edge EXAFS fitting results for  $\text{Cu}_{2.2}\text{Zn}_{0.8}\text{SnSe}_{4-x}\text{Te}_x$  ( $x=0-0.04$ ) CN: coordination number, R: bond distance,  $\sigma^2$ : means square relative displacement,  $\Delta E$ : energy shift; R-factor: fitting quality

| Samples                                                            | Path  | CN            | R( $\text{\AA}$ ) | $\sigma^2 (\times 10^{-3}) (\text{\AA}^2)$ | $\Delta E(\text{eV})$ | R-factor |
|--------------------------------------------------------------------|-------|---------------|-------------------|--------------------------------------------|-----------------------|----------|
| $\text{Cu}_{2.2}\text{Zn}_{0.8}\text{SnSe}_4$                      | Zn-Se | $2.7 \pm 0.2$ | $2.44 \pm 0.004$  | $7.3 \pm 0.6$                              | $0.871 \pm 0.06$      | 0.007    |
|                                                                    | Zn-O  | $0.9 \pm 0.1$ | $1.95 \pm 0.012$  |                                            |                       |          |
| $\text{Cu}_{2.2}\text{Zn}_{0.8}\text{SnSe}_{3.99}\text{Te}_{0.01}$ | Zn-Se | $2.7 \pm 0.2$ | $2.45 \pm 0.005$  | $7.4 \pm 0.6$                              | $0.846 \pm 0.377$     | 0.008    |
|                                                                    | Zn-O  | $0.9 \pm 0.1$ | $1.95 \pm 0.011$  |                                            |                       |          |
| $\text{Cu}_{2.2}\text{Zn}_{0.8}\text{SnSe}_{3.98}\text{Te}_{0.02}$ | Zn-Se | $2.6 \pm 0.3$ | $2.44 \pm 0.005$  | $7.6 \pm 0.7$                              | $1.028 \pm 0.215$     | 0.013    |
|                                                                    | Zn-O  | $1.0 \pm 0.1$ | $1.94 \pm 0.013$  |                                            |                       |          |
| $\text{Cu}_{2.2}\text{Zn}_{0.8}\text{SnSe}_{3.97}\text{Te}_{0.03}$ | Zn-Se | $2.5 \pm 0.2$ | $2.44 \pm 0.004$  | $7.3 \pm 0.6$                              | $0.821 \pm 0.624$     | 0.007    |
|                                                                    | Zn-O  | $0.9 \pm 0.1$ | $1.95 \pm 0.013$  |                                            |                       |          |
| $\text{Cu}_{2.2}\text{Zn}_{0.8}\text{SnSe}_{3.96}\text{Te}_{0.04}$ | Zn-Se | $2.6 \pm 0.2$ | $2.45 \pm 0.004$  | $7.3 \pm 0.5$                              | $1.127 \pm 0.668$     | 0.005    |
|                                                                    | Zn-O  | $1.0 \pm 0.1$ | $1.95 \pm 0.009$  |                                            |                       |          |

**Table.S5** Cu *K*-edge EXAFS fitting results for  $\text{Cu}_{2.2}\text{Zn}_{0.8}\text{SnSe}_{4-x}\text{Te}_x$  ( $x=0-0.04$ ) CN: coordination number, R: bond distance,  $\sigma^2$ : means square relative displacement,  $\Delta E$ : energy shift; R-factor:

fitting quality

| Samples                                                            | Path  | CN            | R(Å)             | $\sigma^2 (\times 10^{-3}) (\text{Å}^2)$ | $\Delta E(\text{eV})$ | R-factor |
|--------------------------------------------------------------------|-------|---------------|------------------|------------------------------------------|-----------------------|----------|
| $\text{Cu}_{2.2}\text{Zn}_{0.8}\text{SnSe}_4$                      | Cu-Se | $3.2 \pm 0.2$ | $2.40 \pm 0.004$ | $8.2 \pm 0.6$                            | $0.992 \pm 0.812$     | 0.003    |
| $\text{Cu}_{2.2}\text{Zn}_{0.8}\text{SnSe}_{3.99}\text{Te}_{0.01}$ | Cu-Se | $3.2 \pm 0.3$ | $2.40 \pm 0.004$ | $8.4 \pm 0.8$                            | $0.957 \pm 0.982$     | 0.009    |
| $\text{Cu}_{2.2}\text{Zn}_{0.8}\text{SnSe}_{3.98}\text{Te}_{0.02}$ | Cu-Se | $3.0 \pm 0.2$ | $2.40 \pm 0.004$ | $8.0 \pm 0.6$                            | $0.804 \pm 0.693$     | 0.006    |
| $\text{Cu}_{2.2}\text{Zn}_{0.8}\text{SnSe}_{3.97}\text{Te}_{0.03}$ | Cu-Se | $3.1 \pm 0.3$ | $2.40 \pm 0.006$ | $8.3 \pm 0.9$                            | $1.699 \pm 1.093$     | 0.012    |
| $\text{Cu}_{2.2}\text{Zn}_{0.8}\text{SnSe}_{3.96}\text{Te}_{0.04}$ | Cu-Se | $3.1 \pm 0.3$ | $2.40 \pm 0.006$ | $8.3 \pm 0.9$                            | $1.519 \pm 1.038$     | 0.010    |

**Table.S6** Se *K*-edge EXAFS fitting results for  $\text{Cu}_{2.2}\text{Zn}_{0.8}\text{SnSe}_{4-x}\text{Te}_x$  ( $x=0-0.04$ ) CN: coordination number, R: bond distance,  $\sigma^2$ : means square relative displacement,  $\Delta E$ : energy shift; R-factor:

fitting quality

| Samples                                                            | Path  | CN            | R(Å)             | $\sigma^2 (\times 10^{-3}) (\text{Å}^2)$ | $\Delta E(\text{eV})$ | R-factor |
|--------------------------------------------------------------------|-------|---------------|------------------|------------------------------------------|-----------------------|----------|
| $\text{Cu}_{2.2}\text{Zn}_{0.8}\text{SnSe}_4$                      | Se-Cu | $1.7 \pm 0.3$ | $2.40 \pm 0.004$ | $4.49 \pm 1.4$                           | $1.37 \pm 1.24$       | 0.02     |
|                                                                    | Se-Zn | $0.1 \pm 0.1$ | $2.44 \pm 0.004$ |                                          |                       |          |
|                                                                    | Se-Sn | $1.0 \pm 0.2$ | $2.56 \pm 0.020$ |                                          |                       |          |
| $\text{Cu}_{2.2}\text{Zn}_{0.8}\text{SnSe}_{3.99}\text{Te}_{0.01}$ | Se-Cu | $1.7 \pm 0.3$ | $2.40 \pm 0.004$ | $4.68 \pm 1.4$                           | $1.38 \pm 1.24$       | 0.028    |
|                                                                    | Se-Zn | $0.1 \pm 0.1$ | $2.45 \pm 0.005$ |                                          |                       |          |
|                                                                    | Se-Sn | $0.6 \pm 0.2$ | $2.56 \pm 0.018$ |                                          |                       |          |
| $\text{Cu}_{2.2}\text{Zn}_{0.8}\text{SnSe}_{3.99}\text{Te}_{0.02}$ | Se-Cu | $1.7 \pm 0.3$ | $2.40 \pm 0.004$ | $4.68 \pm 1.5$                           | $1.31 \pm 1.24$       | 0.027    |
|                                                                    | Se-Zn | $0.1 \pm 0.1$ | $2.44 \pm 0.005$ |                                          |                       |          |
|                                                                    | Se-Sn | $0.6 \pm 0.2$ | $2.56 \pm 0.02$  |                                          |                       |          |
| $\text{Cu}_{2.2}\text{Zn}_{0.8}\text{SnSe}_{3.99}\text{Te}_{0.03}$ | Se-Cu | $1.7 \pm 0.3$ | $2.40 \pm 0.006$ | $4.62 \pm 1.4$                           | $1.38 \pm 1.22$       | 0.026    |
|                                                                    | Se-Zn | $0.1 \pm 0.1$ | $2.44 \pm 0.004$ |                                          |                       |          |
|                                                                    | Se-Sn | $0.7 \pm 0.2$ | $2.56 \pm 0.019$ |                                          |                       |          |
| $\text{Cu}_{2.2}\text{Zn}_{0.8}\text{SnSe}_{3.99}\text{Te}_{0.04}$ | Se-Cu | $1.6 \pm 0.3$ | $2.40 \pm 0.006$ | $4.56 \pm 1.4$                           | $1.24 \pm 1.24$       | 0.027    |
|                                                                    | Se-Zn | $0.1 \pm 0.1$ | $2.45 \pm 0.004$ |                                          |                       |          |
|                                                                    | Se-Sn | $0.7 \pm 0.2$ | $2.56 \pm 0.018$ |                                          |                       |          |

**Table.S7** Electron occupation of  $\text{Cu}_{2.2}\text{Zn}_{0.8}\text{SnSe}_{4-x}\text{Te}_x$  calculated with Te(@Se) as the cluster center

| Atoms  | <i>s</i> | <i>p</i> | <i>d</i> | Charge Transfer | Electron configuration                               | Valence  |
|--------|----------|----------|----------|-----------------|------------------------------------------------------|----------|
| Te-exc | 1.903    | 4.292    | 0.398    | 0.409           | [Kr]4d <sup>10</sup> 5s <sup>2</sup> 5p <sup>4</sup> | -2, 4, 6 |
| Se     | 1.907    | 3.907    | 0.299    | -0.112          | [Ar]3d <sup>10</sup> 4s <sup>2</sup> 4p <sup>4</sup> | -2, 4, 6 |
| Cu     | 0.597    | 0.664    | 9.579    | 0.159           | [Ar]3d <sup>10</sup> 4s <sup>1</sup>                 | 2,1      |
| Sn     | 0.516    | 1.731    | 10.396   | 0.358           | [Kr]4d <sup>10</sup> 5s <sup>2</sup> 5p <sup>2</sup> | 4, 2     |
| Zn     | 0.962    | 1.099    | 10.168   | -0.230          | [Ar]3d <sup>10</sup> 4s <sup>2</sup>                 | 2        |

**Table.S8** Electron occupation of  $\text{Cu}_{2.2}\text{Zn}_{0.8}\text{SnSe}_{4-x}\text{Te}_x$  calculated with Se as the cluster center

| Te <i>L</i> <sub>3</sub> -edge | <i>s</i> | <i>p</i> | <i>d</i> | Charge Transfer | Electron configuration                               | Valence  |
|--------------------------------|----------|----------|----------|-----------------|------------------------------------------------------|----------|
| Se-exc                         | 1.966    | 4.576    | 0.260    | 0.198           | [Kr]4d <sup>10</sup> 5s <sup>2</sup> 5p <sup>4</sup> | -2, 4, 6 |
| Se                             | 1.895    | 3.930    | 0.268    | -0.093          | [Ar]3d <sup>10</sup> 4s <sup>2</sup> 4p <sup>4</sup> | -2, 4, 6 |
| Cu                             | 0.594    | 0.660    | 9.614    | 0.131           | [Ar]3d <sup>10</sup> 4s <sup>1</sup>                 | 2,1      |
| Sn                             | 1.558    | 1.705    | 10.397   | 0.340           | [Kr]4d <sup>10</sup> 5s <sup>2</sup> 5p <sup>2</sup> | 4, 2     |

|    |       |       |        |        |                                      |   |
|----|-------|-------|--------|--------|--------------------------------------|---|
| Zn | 0.963 | 1.078 | 10.190 | -0.231 | [Ar]3d <sup>10</sup> 4s <sup>2</sup> | 2 |
|----|-------|-------|--------|--------|--------------------------------------|---|

**Table.S9** Electron occupation of Cu<sub>2.2</sub>Zn<sub>0.8</sub>SnSe<sub>4-x</sub>Te<sub>x</sub> by Cu K-edge XANES calculations

| Cu K-edge | <i>s</i> | <i>p</i> | <i>d</i> | Charge Transfer | Electron configuration                               | Valence  |
|-----------|----------|----------|----------|-----------------|------------------------------------------------------|----------|
| Cu-exc    | 0.948    | 1.139    | 10.198   | -0.285          | [Ar]3d <sup>10</sup> 4s <sup>1</sup>                 | 2,1      |
| Se        | 1.900    | 3.927    | 0.251    | -0.078          | [Ar]3d <sup>10</sup> 4s <sup>2</sup> 4p <sup>4</sup> | -2, 4, 6 |
| Cu        | 0.600    | 0.678    | 9.598    | 0.125           | [Ar]3d <sup>10</sup> 4s <sup>1</sup>                 | 2,1      |
| Sn        | 1.528    | 1.749    | 10.400   | 0.323           | [Kr]4d <sup>10</sup> 5s <sup>2</sup> 5p <sup>2</sup> | 4, 2     |
| Zn        | 0.964    | 1.109    | 10.185   | -0.259          | [Ar]3d <sup>10</sup> 4s <sup>2</sup>                 | 2        |

**Table.S10** Electron occupation of Cu<sub>2.2</sub>Zn<sub>0.8</sub>SnSe<sub>4-x</sub>Te<sub>x</sub> by Sn K-edge XANES calculations

| Sn K-edge | <i>s</i> | <i>p</i> | <i>d</i> | Charge Transfer | Electron configuration                               | Valence  |
|-----------|----------|----------|----------|-----------------|------------------------------------------------------|----------|
| Sn-exc    | 1.759    | 2.346    | 10.460   | 0.435           | [Kr]4d <sup>10</sup> 5s <sup>2</sup> 5p <sup>2</sup> | 4, 2     |
| Se        | 1.898    | 3.877    | 0.282    | -0.057          | [Ar]3d <sup>10</sup> 4s <sup>2</sup> 4p <sup>4</sup> | -2, 4, 6 |
| Cu        | 0.613    | 0.684    | 9.598    | 0.105           | [Ar]3d <sup>10</sup> 4s <sup>1</sup>                 | 2,1      |
| Sn        | 1.530    | 1.766    | 10.401   | 0.303           | [Kr]4d <sup>10</sup> 5s <sup>2</sup> 5p <sup>2</sup> | 4, 2     |
| Zn        | 0.977    | 1.122    | 10.186   | -0.285          | [Ar]3d <sup>10</sup> 4s <sup>2</sup>                 | 2        |

**Table.S11** Electron occupation of Cu<sub>2.2</sub>Zn<sub>0.8</sub>SnSe<sub>4-x</sub>Te<sub>x</sub> by Zn K-edge XANES calculations

| Zn K-edge | <i>s</i> | <i>p</i> | <i>d</i> | Charge Transfer | Electron configuration                               | Valence  |
|-----------|----------|----------|----------|-----------------|------------------------------------------------------|----------|
| Zn-exc    | 1.232    | 1.421    | 10.328   | 0.019           | [Ar]3d <sup>10</sup> 4s <sup>2</sup>                 | 2        |
| Se        | 1.896    | 3.864    | 0.271    | -0.031          | [Ar]3d <sup>10</sup> 4s <sup>2</sup> 4p <sup>4</sup> | -2, 4, 6 |
| Cu        | 0.617    | 0.694    | 9.606    | 0.082           | [Ar]3d <sup>10</sup> 4s <sup>1</sup>                 | 2,1      |
| Sn        | 1.534    | 1.790    | 10.406   | 0.270           | [Kr]4d <sup>10</sup> 5s <sup>2</sup> 5p <sup>2</sup> | 4, 2     |
| Zn        | 0.988    | 1.133    | 10.190   | -0.311          | [Ar]3d <sup>10</sup> 4s <sup>2</sup>                 | 2        |
